# Supplementary material
Source: publisher site journal article supplement (https://www.dovepress.com/article/553964)
Supplement: Supplementary file 1 [file 553964%20Supplementary%20Material.docx]

**Table S1** Coding methods and cutpoint rationale for all variables

| Covariate | Definition | Coding Method | Cutpoint Rationale |
| --- | --- | --- | --- |
| Age | Age was calculated based on the date of birth recorded in the patient's ID card, with precision to the year. | Continuous: years | / |
| Sex | / | Categorical: 0 = female, 1 = male | / |
| Alcohol Consumption | Based on patients' self-report | Categorical: 0 = never, 1 = past, 2 = current drinker | One standard alcohol unit was defined as 10 grams (g) of pure ethanol, consistent with the Chinese Guidelines for Dietary Guidelines (2022) and international standards for alcohol research. Alcohol consumption: Categorized as never drank, past drinker (ceased ≥1 year), or current drinker. One standard alcohol unit = 10 g pure ethanol (equivalent to 250 mL beer, 100 mL wine, or 30 mL liquor). Current drinker thresholds: men ≥14 units/week, women ≥7 units/week (based on sex-specific metabolism differences and WHO guidelines); |
| Smoking History | Based on patients' self-report | Categorical: 0 = never, 1 = past, 2 = current drinker | The critical value is based on the definition of "regular smoking" as stated in the "Chinese Clinical Smoking Cessation Guidelines (2022)". Categorized as never smoked, past smoker (quit ≥1 year), or current smoker (≥1 cigarette/day for ≥6 months). |
| Educational Level | Based on patients' self-report | Categorical：0 = < 5 years (incomplete primary school or lower)1 = ≥ 5 years (completed primary school or higher) | With reference to the distribution characteristics of educational levels among the elderly population in China, 5 years is a common duration for completing primary education. |
| Residence | Classified by patients' long-term residential address (residing for ≥ 6 months) | Categorical: 0 = Rural (townships and below)  1 = Urban (county-level cities and above) | In accordance with the standards specified in the National Bureau of Statistics' Statistical Division Code and Urban-Rural Division Code. |
| BMI | kg/m² | Continuous，kg/m² | / |
| Comorbidities | Based on electronic medical records | Categorical: 0 = No(＜2 chronic diseases), 1 = Yes(≥2 chronic diseases) | China Chronic Disease Coding Catalogue |
| Polypharmacy | Based on electronic medical records | Categorical: 0 = No(＜5 medications), 1 = Yes (≥5 medications) | five or more medications are considered polypharmacy, with polypharmacy referenced from the Chinese Geriatric Inappropriate Medication Directory |

**Abbreviations:** BMI, Body Mass Index.

**Table S2** Chronic diseases included in comorbidities and their corresponding ICD-10 codes

| Disease category | Diseases | ICD-10 |
| --- | --- | --- |
| Cardiovascular diseases | Hypertension | I10-I15 |
|  | Coronary heart disease | I20-I25 |
|  | Heart failure | I50 |
|  | Stroke/transient ischemic attack | I60-I69 |
| Metabolic diseases | Type 2 diabetes mellitus | E11 |
|  | Dyslipidemia | E78 |
|  | Obesity | E66 |
| Respiratory diseases | Chronic obstructive pulmonary disease | J44 |
|  | Asthma | J45-J46 |
|  | Interstitial lung disease | J84 |
| Musculoskeletal diseases | Osteoarthritis | M15-M19 |
|  | Rheumatoid arthritis | M05-M06 |
|  | Osteoporosis | M80-M81 |
| Neurological diseases | Parkinson’s disease | G20 |
|  | Alzheimer’s disease/dementia | G30, F01-F03 |
| Renal/hepatic diseases | Chronic kidney disease | N18 |
|  | Chronic liver disease | K70, K73-K74 |

**Abbreviations:** ICD-10, International Classification of Diseases, 10th Revision

**Table S3** Laboratory details of inflammatory biomarkers

|  | IL-6、IL-10、TNF-α | hs-CRP |
| --- | --- | --- |
| Manufacturer | Jiangxi Saiji Biotechnology Co., Ltd. | Micon Bioengineering Co., Ltd. |
| Registration Certificate Number | Jiangxi Medical Device Registration Approval 20192400359 | Zhejiang Medical Device Registration Approval 20222401135 |
| Production License Number | Jiangxi Pharmaceutical Supervision Medical Device Production License No. 20190277 | Zhejiang Pharmaceutical Pharmaceutical Supervision Medical Device Production License No. 20130042 |
| Limit of Detection | 2.5pg/mL | 0.5mg/L |
| Limit of Quantitation | 2500pg/mL | 300mg/L |
| Dynamic Range | 2.5-2500pg/mL | 0.5-300mg/L |
| Intra-assay Coefficient of Variation | ≤15% | ≤10% |
| Inter-assay Coefficient of Variation | ≤15% | ≤15% |

**Abbreviations:** hs-CRP, high-sensitivity C-reactive protein; IL-6, interleukin-6; IL-10, interleukin-10; TNF-α, tumor necrosis factor-alpha.


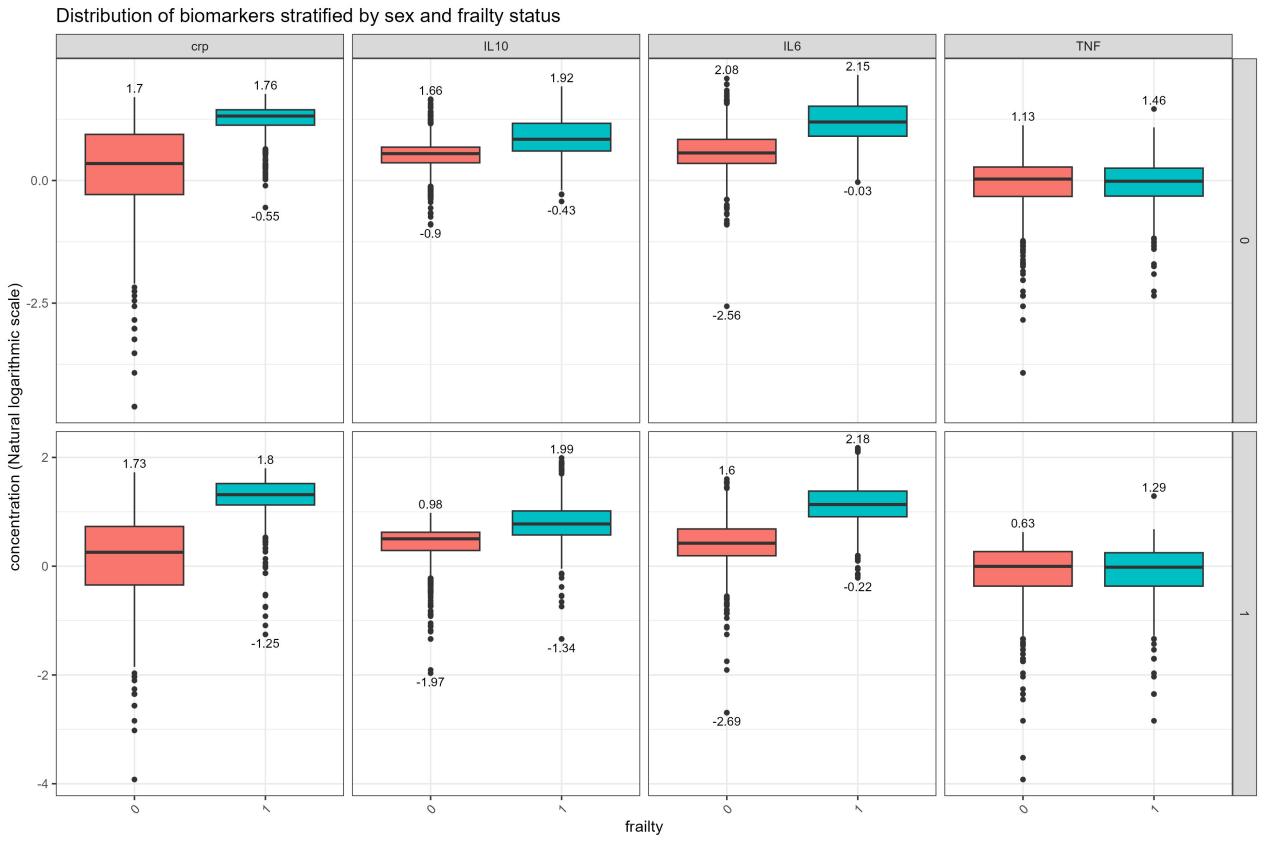


**Figure S1** Boxplots of Inflammatory Biomarkers Stratified by Sex and Frailty Status
